# Supplementary material for: Deciphering the regulatory mechanisms of the cAMP/protein kinase A pathway and their roles in the pathogenicity of Candida auris
Source: PubMed Central journal article supplement (PMC10581177; doi:10.1128/spectrum.02152-23), 2023-09-06
Supplement: spectrum.02152-23-s0002.pdf [file spectrum.02152-23-s0002.pdf]

**Table S1. *C. auris* strains and primers used in this study**

| <b>Strains used in this study</b> |                                                         |               |                  |
|-----------------------------------|---------------------------------------------------------|---------------|------------------|
| <b>Strain</b>                     | <b>Genotype</b>                                         | <b>Parent</b> | <b>Reference</b> |
| <b>B8441</b>                      | Wild-type                                               |               | (1)              |
| <b>YSBA4</b>                      | <i>bcy1Δ::NAT</i>                                       | B8441         | (2)              |
| <b>YSBA21</b>                     | <i>cyr1Δ::NAT</i>                                       | B8441         | (2)              |
| <b>YSBA24</b>                     | <i>tpk2Δ::NAT tpk1Δ::HYG</i>                            | YSBA17        | (2)              |
| <b>YSBA39</b>                     | <i>gpa2Δ::NAT</i>                                       | B8441         | This study       |
| <b>YSBA40</b>                     | <i>gpa2Δ::NAT</i>                                       | B8441         | This study       |
| <b>YSBA41</b>                     | <i>ras1Δ::NAT</i>                                       | B8441         | This study       |
| <b>YSBA42</b>                     | <i>ras1Δ::NAT</i>                                       | B8441         | This study       |
| <b>YSBA46</b>                     | <i>gpr1Δ::NAT</i>                                       | B8441         | This study       |
| <b>YSBA47</b>                     | <i>gpr1Δ::NAT</i>                                       | B8441         | This study       |
| <b>YSBA50</b>                     | <i>ras1Δ+RAS1-HYG</i>                                   | YSBA42        | This study       |
| <b>YSBA53</b>                     | <i>gpa2Δ+GPA2-HYG</i>                                   | YSBA39        | This study       |
| <b>YSBA55</b>                     | <i>pde1Δ::NAT</i>                                       | B8441         | This study       |
| <b>YSBA56</b>                     | <i>pde1Δ::NAT</i>                                       | B8441         | This study       |
| <b>YSBA57</b>                     | <i>gpr1Δ::GPR1-HYG</i>                                  | B8441         | This study       |
| <b>YSBA59</b>                     | <i>pde2Δ::NAT</i>                                       | B8441         | This study       |
| <b>YSBA60</b>                     | <i>pde2Δ::NAT</i>                                       | B8441         | This study       |
| <b>YSBA61</b>                     | <i>cdc25Δ::NAT</i>                                      | B8441         | This study       |
| <b>YSBA62</b>                     | <i>cdc25Δ::NAT</i>                                      | B8441         | This study       |
| <b>YSBA63</b>                     | <i>ira2Δ::NAT</i>                                       | B8441         | This study       |
| <b>YSBA64</b>                     | <i>ira2Δ::NAT</i>                                       | B8441         | This study       |
| <b>YSBA66</b>                     | <i>pde1Δ::PDE1-HYG</i>                                  | B8441         | This study       |
| <b>YSBA68</b>                     | <i>gpa2Δ::NAT ras1Δ::HYG</i>                            | YSBA39        | This study       |
| <b>YSBA69</b>                     | <i>gpa2Δ::NAT ras1Δ::HYG</i>                            | YSBA39        | This study       |
| <b>YSBA70</b>                     | <i>pde2Δ::NAT pde1Δ::HYG</i>                            | YSBA59        | This study       |
| <b>YSBA71</b>                     | <i>pde2Δ::NAT pde1Δ::HYG</i>                            | YSBA59        | This study       |
| <b>YSBA93</b>                     | <i>cdc25Δ+CDC25-HYG</i>                                 | YSBA61        | This study       |
| <b>YSBA95</b>                     | <i>pde2Δ::PDE2-HYG</i>                                  | YSBA70        | This study       |
| <b>YSBA140</b>                    | <i>ira2Δ::IRA2-HYG</i>                                  | YSBA63        | This study       |
| <b>YSBA162</b>                    | <i>P<sub>TEF1</sub>:BCY1::NEO pde2Δ::NAT pde1Δ::HYG</i> | YSBA70        | This study       |

## Primers used in this study

| Name   | Primer description                         | Sequence (5' to 3')                      |
|--------|--------------------------------------------|------------------------------------------|
| B13593 | <i>RAS1</i> 5'-flanking region primer L1   | GTGACGAGTGTGGCGAAG                       |
| B13594 | <i>RAS1</i> 5'-flanking region primer L2   | TTCAGATCCACTAGTTCTAGAACTTATACTCTTTAACAT  |
| B13595 | <i>RAS1</i> 3'-flanking region primer R1   | TTCCAGAAATTCCTTCTTAGGTGTTGTGTGATTGTGTAG  |
| B13596 | <i>RAS1</i> 3'-flanking region primer R2   | AAATGCGACAAACAAGAAAA                     |
| B13597 | <i>RAS1</i> 5'-screening primer SO         | TGATGGAGATTCGTGTAAGA                     |
| B13598 | <i>RAS1</i> 3'-screening primer SO2        | TCTACCAGAGAAATATTTTT                     |
| B13599 | <i>RAS1</i> Southern blot probe primer PO  | TCATGTAAGTCTCTCATG                       |
| B13993 | <i>RAS1</i> Internal screening primer LP   | GAGGGTCAAAGATTCCGACA                     |
| B13994 | <i>RAS1</i> Internal screening primer RP   | TGTCTTGTGTTGCCACCAT                      |
| B13646 | <i>GPA2</i> 5'-flanking region primer L1   | GTTTTGTCTACTTTCATCAT                     |
| B13647 | <i>GPA2</i> 5'-flanking region primer L2   | TTCAGATCCACTAGTTCTAGCTGGGTTTGAGGGAGGGTCT |
| B13648 | <i>GPA2</i> 3'-flanking region primer R1   | TTCCAGAAATTCCTTACCTTGAGAGACAGTGGCATA     |
| B13649 | <i>GPA2</i> 3'-flanking region primer R2   | GTTCCACTGAGAGCTCTTC                      |
| B13650 | <i>GPA2</i> 5'-screening primer SO         | GTCCTTACGTCCCTCATAT                      |
| B13651 | <i>GPA2</i> 3'-screening primer SO2        | TTAAGATTCAGGATGGGACA                     |
| B13652 | <i>GPA2</i> Southern blot probe primer PO  | CTTTTTCCAGCCAGTGAC                       |
| B13988 | <i>GPA2</i> Internal screening primer LP   | AAATGTGTTGGATTGCGTCA                     |
| B13989 | <i>GPA2</i> Internal screening primer RP   | TTTGAAACGGAAATCGAAG                      |
| B13586 | <i>GPR1</i> 5'-flanking region primer L1   | ATCAATTAAGCGAAAAGTA                      |
| B13587 | <i>GPR1</i> 5'-flanking region primer L2   | TTCAGATCCACTAGTTCTAGTTGTAGTTGGGACGAGACAT |
| B13588 | <i>GPR1</i> 3'-flanking region primer R1   | TTCCAGAAATTCCTTATTTTACGAGACGGTCATTGA     |
| B13589 | <i>GPR1</i> 3'-flanking region primer R2   | TCCCAGCTGAGCCAGCCTA                      |
| B13590 | <i>GPR1</i> 5'-screening primer SO         | TTGCTTTATATACTGGATGT                     |
| B13591 | <i>GPR1</i> 3'-screening primer SO2        | TCTCAAACACTATGATGCC                      |
| B13592 | <i>GPR1</i> Southern blot probe primer PO  | GGTGACGAAACACGAGCCTT                     |
| B13991 | <i>GPR1</i> Internal screening primer LP   | GACTCTAATGGCACCCCTGA                     |
| B13992 | <i>GPR1</i> Internal screening primer RP   | ACGCTCTACCAATGCTACC                      |
| B15075 | <i>CDC25</i> 5'-flanking region primer L1  | CAATTCGATAATGCGGTCTT                     |
| B15076 | <i>CDC25</i> 5'-flanking region primer L2  | TTCAGATCCACTAGTTCTAGCGCAGCATCTCTCCGTTACT |
| B15077 | <i>CDC25</i> 3'-flanking region primer R1  | TTCCAGAAATTCCTTAAATCAGTGGACCGCAGTTCT     |
| B15078 | <i>CDC25</i> 3'-flanking region primer R2  | GGGCATCAATTGACTTTTGG                     |
| B15079 | <i>CDC25</i> 5'-screening primer SO        | CATTACCGTGATGAACCTG                      |
| B15080 | <i>CDC25</i> 3'-screening primer SO2       | ATTCGCCGCCCTTCTTCTTAT                    |
| B15083 | <i>CDC25</i> Southern blot probe primer PO | GTTCAAGACCGGCTGAACAT                     |
| B15081 | <i>CDC25</i> Internal screening primer LP  | TCAGCTGGTTGACTTGAACG                     |
| B15082 | <i>CDC25</i> Internal screening primer RP  | AATTGAGGTAAGGCCGTGTG                     |
| B15084 | <i>IRA2</i> 5'-flanking region primer L1   | ATCCTATCGGCACCTTCTGA                     |
| B15085 | <i>IRA2</i> 5'-flanking region primer L2   | TTCAGATCCACTAGTTCTAGCAATGTCGAGCCATCTTTGA |
| B15086 | <i>IRA2</i> 3'-flanking region primer R1   | TTCCAGAAATTCCTTAGAACGAGTGCACATGAAGA      |
| B15087 | <i>IRA2</i> 3'-flanking region primer R2   | ATGATCTTGAAGCGGAAACC                     |

|               |                                                 |                                          |
|---------------|-------------------------------------------------|------------------------------------------|
| <b>B15088</b> | <i>IRA2</i> 5'-screening primer SO              | TCAACCCGGGCAAGTATATC                     |
| <b>B15089</b> | <i>IRA2</i> 3'-screening primer SO2             | AAGTAACGTGGGCAGTCACC                     |
| <b>B15092</b> | <i>IRA2</i> Southern blot probe primer PO       | TGCGATTCATTGACAATGC                      |
| <b>B15090</b> | <i>IRA2</i> Internal screening primer LP        | ACGCTTTGCTTGAACGAGAT                     |
| <b>B15091</b> | <i>IRA2</i> Internal screening primer RP        | GCACGCTGACTCGTGAAATA                     |
| <b>B14856</b> | <i>PDE1</i> 5'-flanking region primer L1        | CCTAAAGGTGGAGAACCAGA                     |
| <b>B14857</b> | <i>PDE1</i> 5'-flanking region primer L2        | TTCAGATCCACTAGTTCTAGTGGAGGTTGGAAGAAAATGG |
| <b>B14858</b> | <i>PDE1</i> 3'-flanking region primer R1        | TTCCAGAATTTCACTCTTATGAGATTAGGGCACCTCTCC  |
| <b>B14859</b> | <i>PDE1</i> 3'-flanking region primer R2        | ATCTCACGCGAAGGTCTGT                      |
| <b>B14860</b> | <i>PDE1</i> 5'-screening primer SO              | AATTGGTGCCTTACGACCTG                     |
| <b>B14861</b> | <i>PDE1</i> 3'-screening primer SO2             | GCAGCCATTGCTCACAATA                      |
| <b>B14864</b> | <i>PDE1</i> Southern blot probe primer PO       | GGGCTTGATCAACAAAGAGC                     |
| <b>B14862</b> | <i>PDE1</i> Internal screening primer LP        | GCTCAGGCCATTTACTGCTC                     |
| <b>B14863</b> | <i>PDE1</i> Internal screening primer RP        | ATAAGGTGTTCTGGGCATGAG                    |
| <b>B14865</b> | <i>PDE2</i> 5'-flanking region primer L1        | AGCCAGAGGACAGCGATAAA                     |
| <b>B14866</b> | <i>PDE2</i> 5'-flanking region primer L2        | TTCAGATCCACTAGTTCTAGGGAACGAGGTGAAGAAGGAG |
| <b>B14867</b> | <i>PDE2</i> 3'-flanking region primer R1        | TTCCAGAATTTCACTCTTACGCAAATGGGTATCCTATTG  |
| <b>B14868</b> | <i>PDE2</i> 3'-flanking region primer R2        | GGGCAGGAGAGTACAGCAAG                     |
| <b>B14869</b> | <i>PDE2</i> 5'-screening primer SO              | TGATTCGGCTTCCCTAATTG                     |
| <b>B14870</b> | <i>PDE2</i> 3'-screening primer SO2             | CTGCAGCAGACTTTGAGCTG                     |
| <b>B14873</b> | <i>PDE2</i> Southern blot probe primer PO       | ACGGAATTTGACGGACTGAG                     |
| <b>B14871</b> | <i>PDE2</i> Internal screening primer LP        | GTGTTTCTTTGGCACCTGT                      |
| <b>B14872</b> | <i>PDE2</i> Internal screening primer RP        | TTGAAGCTCGCCTCTCTCTC                     |
| <b>B14736</b> | <i>RAS1</i> 5'-flanking region primer L1 (HYG)  | AAGAGGCAAATGCGAGACAT                     |
| <b>B14570</b> | <i>RAS1</i> 5'-flanking region primer L2 (HYG)  | GCACTTTTCGGGAAATGTGAACTTATACTCTTTTAACAT  |
| <b>B14571</b> | <i>RAS1</i> 3'-flanking region primer R1 (HYG)  | CGATGAGGTAGTGCAAGTTAGGTGTTGTGTGATTGTGTAG |
| <b>B14737</b> | <i>RAS1</i> 3'-flanking region primer R2 (HYG)  | AAAAGCTGAACTTGGCAGGA                     |
| <b>B13597</b> | <i>RAS1</i> 5'-screening primer SO (HYG)        | TGATGGAGATTCTGTGAAGA                     |
| <b>B13598</b> | <i>RAS1</i> 3'-screening primer SO2 (HYG)       | TCTACCAGAGAAATATTTTT                     |
| <b>B13599</b> | <i>RAS1</i> Southern blot probe primer PO (HYG) | TCATGTACTGCTCTCTCATG                     |
| <b>B14899</b> | <i>RAS1</i> Internal screening primer LP (HYG)  | GGCGGTGGTGTGGTAA                         |
| <b>B13994</b> | <i>RAS1</i> Internal screening primer RP (HYG)  | TGTCTTGTGTTGCCACCAT                      |
| <b>B14856</b> | <i>PDE1</i> 5'-flanking region primer L1 (HYG)  | CCTAAAGGTGGAGAACCAGA                     |
| <b>B15149</b> | <i>PDE1</i> 5'-flanking region primer L2 (HYG)  | GCACTTTTCGGGAAATGTGTGGAGGTTGGAAGAAAATGG  |
| <b>B15150</b> | <i>PDE1</i> 3'-flanking region primer R1 (HYG)  | CGATGAGGTAGTGCAAGTTATGAGATTAGGGCACCTCTCC |
| <b>B14859</b> | <i>PDE1</i> 3'-flanking region primer R2 (HYG)  | ATCTCACGCGAAGGTCTGT                      |
| <b>B14860</b> | <i>PDE1</i> 5'-screening primer SO (HYG)        | AATTGGTGCCTTACGACCTG                     |
| <b>B14861</b> | <i>PDE1</i> 3'-screening primer SO2 (HYG)       | GCAGCCATTGCTCACAATA                      |
| <b>B14864</b> | <i>PDE1</i> Southern blot probe primer PO (HYG) | GGGCTTGATCAACAAAGAGC                     |
| <b>B14862</b> | <i>PDE1</i> Internal screening primer LP (HYG)  | GCTCAGGCCATTTACTGCTC                     |
| <b>B14863</b> | <i>PDE1</i> Internal screening primer RP (HYG)  | ATAAGGTGTTCTGGGCATGAG                    |

|               |                                                                             |                                         |
|---------------|-----------------------------------------------------------------------------|-----------------------------------------|
| <b>B17979</b> | <i>BCYI</i> 5' flanking region primer 1 ( <i>TEF1</i> promoter replacement) | CTTTCACAAAGTGGTCCAAGG                   |
| <b>B17980</b> | <i>BCYI</i> 5' flanking region primer 2 ( <i>TEF1</i> promoter replacement) | GTATTCTGGGCCTCCATGTCTGCAAATTAATGATATCG  |
| <b>B17981</b> | <i>BCYI</i> 3' flanking region primer 1 ( <i>TEF1</i> promoter replacement) | CTACTTCACATCAATTAACATGGCTCCGTTCCGTACAGA |
| <b>B17982</b> | <i>BCYI</i> 3' flanking region primer 2 ( <i>TEF1</i> promoter replacement) | TCGGCTGAGACAGAGGTCT                     |
| <b>B10742</b> | <i>BCYI</i> Screening primer ( <i>TEF1</i> promoter replacement)            | GGTTTTGCTTCTCTGCG                       |
| <b>B11103</b> | pV1025 forward-extended primer                                              | CTAGAACTAGTGGATCTGAA                    |
| <b>B11104</b> | pV1025 reverse-extended primer                                              | TAAGAGTGAAATCTGGAAA                     |
| <b>B11105</b> | NAT spilt primer 1                                                          | CCATTGACTAAGGTTTTCCC                    |
| <b>B11106</b> | NAT spilt primer 2                                                          | TTCAGTAGCCAAACCCATC                     |
| <b>B11107</b> | pV1025 Diagnostic screening primer 1                                        | TCAGTGGCAAATCCTAACC                     |
| <b>B11108</b> | pV1025 Diagnostic screening primer 2                                        | AGAGAAAATACCCGTGACG                     |
| <b>B12462</b> | pYM70 forward-extended primer                                               | CACATTTCCCCGAAAAGTGC                    |
| <b>B12463</b> | pYM70 reverse-extended primer                                               | TAACTTGCACTACCTCATCG                    |
| <b>B12464</b> | HYG spilt primer 1                                                          | TGCTGATTTGTCTCAAACCTT                   |
| <b>B12465</b> | HYG split primer 2                                                          | TACCATTATCAGTCAAAAACA                   |
| <b>B12486</b> | pYM70 Diagnostic screening primer 1                                         | TGCGGCACAATTGAATAGGG                    |
| <b>B12487</b> | pYM70 Diagnostic screening primer 2                                         | CGGTGATGACGGTGAAAACC                    |
| <b>B16376</b> | pTO149 forward-extended primer                                              | GACATGGAGGCCAGAAATAC                    |
| <b>B16377</b> | pTO149 reverse-extended primer                                              | CAGTATAGCGACCAGCATTC                    |
| <b>B16378</b> | NEO spilt primer 1                                                          | TGCTCCTGCCGAGAAAGTAT                    |
| <b>B16379</b> | NEO spilt primer 2                                                          | GCTCTTCGTCGAGATCATCC                    |
| <b>B16380</b> | pTO149 Diagnostic screening primer 1                                        | ACATGGGGATGTATGGGCTA                    |
| <b>B16381</b> | pTO149 Diagnostic screening primer 2                                        | TTTTCGCCTCGACATCATCT                    |
| <b>B16376</b> | pNEO-TEF1 forward-extended primer                                           | GACATGGAGGCCAGAAATAC                    |
| <b>B17918</b> | pNEO-TEF1 reverse-extended primer                                           | TTTTGTTAGTTTTTGAGGTG                    |
| <b>B14393</b> | CLP for <i>RAS1</i> complementation                                         | ACTAGTAAGCGCGCAGGAACGAAACC              |
| <b>B14394</b> | CRP for <i>RAS1</i> complementation                                         | ACTAGTGAGAACGTCAAGACAATTCC              |
| <b>B14397</b> | Screening primer for <i>RAS1</i> complementation                            | CGTGGAGGTGCAAGTAACGG                    |
| <b>B14395</b> | <i>RAS1</i> sequencing primer 1                                             | TTTGATAGACTAGACAAAACG                   |
| <b>B14396</b> | <i>RAS1</i> sequencing primer 2                                             | AGGTGCCGAATTGGCAAAAAG                   |
| <b>B14483</b> | CLP for <i>GPA2</i> complementation                                         | ACTAGTACTAATGTCTGAGCAGAGTT              |
| <b>B14484</b> | CRP for <i>GPA2</i> complementation                                         | ACTAGTGCAATGAGCCAAGGACAGA               |
| <b>B14488</b> | Screening primer for <i>GPA2</i> complementation                            | TGGCAATTTTTCAAGGAACA                    |
| <b>B14485</b> | <i>GPA2</i> sequencing primer 1                                             | CTACGTGAGATTCAGTATGA                    |
| <b>B14486</b> | <i>GPA2</i> sequencing primer 2                                             | TATTCATTTCTTTTCTTTT                     |
| <b>B14487</b> | <i>GPA2</i> sequencing primer 3                                             | TGGTGAATGCAATCATTGAT                    |
| <b>B14801</b> | CLP for <i>GPR1</i> complementation                                         | GCATGCTGCAAGCACATTCCGCACTG              |
| <b>B14802</b> | CRP for <i>GPR1</i> complementation                                         | GCATGCGATGATATGAAGATGCAAGA              |
| <b>B14806</b> | Screening primer for <i>GPR1</i> complementation                            | GGTCTGCGAGGTTCTCTTTG                    |
| <b>B14803</b> | <i>GPR1</i> sequencing primer 1                                             | CCCAGTGCCAGGCTACTTTT                    |

|               |                                                   |                            |
|---------------|---------------------------------------------------|----------------------------|
| <b>B14804</b> | <i>GPR1</i> sequencing primer 2                   | TAACCTTTCAGTCAAGGTGC       |
| <b>B14805</b> | <i>GPR1</i> sequencing primer 3                   | GCTTTCATGCAACCATTTAA       |
| <b>B15155</b> | CLP for <i>CDC25</i> complementation              | CGTTGACACCAACAACGAAC       |
| <b>B15156</b> | CRP for <i>CDC25</i> complementation              | GGGCCCTCTGTTTCATCTCCGCTTCT |
| <b>B15207</b> | CLP2 for <i>CDC25</i> complementation             | TTAATTAAGTTATTTATTCG       |
| <b>B15208</b> | CRP2 for <i>CDC25</i> complementation             | TTAATTAAGCCATTCATATT       |
| <b>B15164</b> | Screening primer for <i>CDC25</i> complementation | GGTCATCAAACCCTCCTCAA       |
| <b>B15157</b> | <i>CDC25</i> sequencing primer 1                  | CTCATTGCAACCGTTTCGG        |
| <b>B15158</b> | <i>CDC25</i> sequencing primer 2                  | CATTCTAATTCTCTCACATG       |
| <b>B15159</b> | <i>CDC25</i> sequencing primer 3                  | TTAGTAACGGAGAGATGCTG       |
| <b>B15160</b> | <i>CDC25</i> sequencing primer 4                  | CAATGTCAACCAGCAGTTCA       |
| <b>B15161</b> | <i>CDC25</i> sequencing primer 5                  | TCCTAGCAGATGAGTTCAAT       |
| <b>B15162</b> | <i>CDC25</i> sequencing primer 6                  | TTGTTGAAGAGAGAGAGACA       |
| <b>B15163</b> | <i>CDC25</i> sequencing primer 7                  | CAGATTAATAAGCTTGCCTG       |
| <b>B16075</b> | CLP for <i>IRA2</i> complementation               | TTTACAACATATAAGAACT        |
| <b>B16076</b> | CRP for <i>IRA2</i> complementation               | GGGCCCACTTCGAAACCATAAAGGTG |
| <b>B16077</b> | CLP2 for <i>IRA2</i> complementation              | TCTAGAGAAAGCAATGTTCA       |
| <b>B16078</b> | CRP2 for <i>IRA2</i> complementation              | TCTAGAGTTCCGCAACATGG       |
| <b>B15175</b> | Screening primer for <i>IRA2</i> complementation  | GAAGCCCGTGAACGACGCCG       |
| <b>B15167</b> | <i>IRA2</i> sequencing primer 1                   | CTTCATTTTCTTGAACAAGT       |
| <b>B15168</b> | <i>IRA2</i> sequencing primer 2                   | ACTGCAATCAAAAATGATGG       |
| <b>B15169</b> | <i>IRA2</i> sequencing primer 3                   | AAACTAGTGCATGAAATGGC       |
| <b>B15170</b> | <i>IRA2</i> sequencing primer 4                   | CCCGTTCCATAGCTTAACGG       |
| <b>B15171</b> | <i>IRA2</i> sequencing primer 5                   | TGTAATCTACAACGACTGCC       |
| <b>B15172</b> | <i>IRA2</i> sequencing primer 6                   | CTAGGCAATTTTGTGCGATT       |
| <b>B15173</b> | <i>IRA2</i> sequencing primer 7                   | GCGATCACTCTTGTGCGGTAC      |
| <b>B15174</b> | <i>IRA2</i> sequencing primer 8                   | CCTTCGGTTGTACAACCATC       |
| <b>B15069</b> | CLP for <i>PDE1</i> complementation               | AGAAGGTGACCAAAGAAGAA       |
| <b>B15070</b> | CRP for <i>PDE1</i> complementation               | CTTATTACCATCAATGAGAA       |
| <b>B15074</b> | Screening primer for <i>PDE1</i> complementation  | TCAATTGCGATTCCCTCCCA       |
| <b>B15071</b> | <i>PDE1</i> sequencing primer 1                   | AATAAGTGCAGATCTTCGGT       |
| <b>B15072</b> | <i>PDE1</i> sequencing primer 2                   | ATTGCATCCCCACAATTCTC       |
| <b>B15073</b> | <i>PDE1</i> sequencing primer 3                   | GAAGCAACCTACAAGTCAGC       |
| <b>B15241</b> | CLP for <i>PDE2</i> complementation               | ATTCAGGTGGATTCTTGAT        |
| <b>B15242</b> | CRP for <i>PDE2</i> complementation               | CCACTGGAGGCAGCGAAAGC       |
| <b>B15247</b> | Screening primer for <i>PDE2</i> complementation  | CGGTGTTTGACATGCTCAAG       |
| <b>B15243</b> | <i>PDE2</i> sequencing primer 1                   | AGAGTAAATTTAAAGACAGC       |
| <b>B15244</b> | <i>PDE2</i> sequencing primer 2                   | CACCGCACACAGTTGATTA        |
| <b>B15245</b> | <i>PDE2</i> sequencing primer 3                   | AAATCTACAATGAAAGATCG       |
| <b>B15246</b> | <i>PDE2</i> sequencing primer 4                   | TAGATTTGCTCGTAGTAGTG       |
| <b>B11749</b> | <i>ACT1</i> qRT-PCR primer 1                      | TTGCTCCTGAAGAACACCTT       |

|               |                                |                        |
|---------------|--------------------------------|------------------------|
| <b>B11750</b> | <i>ACT1</i> qRT-PCR primer 2   | GCAGGAACGTTGAAGGTCTC   |
| <b>B16935</b> | <i>RAS1</i> qRT-PCR primer 1   | ATGGTGGCAACAACAAGACA   |
| <b>B16936</b> | <i>RAS1</i> qRT-PCR primer 2   | AACACCCGCTCTTCTCCTTT   |
| <b>B16937</b> | <i>CDC25</i> qRT-PCR primer 1  | ACTGGTGAACCCATTCTTC    |
| <b>B16938</b> | <i>CDC25</i> qRT-PCR primer 2  | CAGCGCTGTCAATGATGACT   |
| <b>B16941</b> | <i>PDE1</i> qRT-PCR primer 1   | GGTGGAGTTGGGTGCTCTAA   |
| <b>B16942</b> | <i>PDE1</i> qRT-PCR primer 2   | TATTGCCATGCTGAAGGTCA   |
| <b>B16939</b> | <i>PDE2</i> qRT-PCR primer 1   | CGATCCCAGAGAGAAATGAGC  |
| <b>B16940</b> | <i>PDE2</i> qRT-PCR primer 2   | ACAGGTGCCAAAGGAAACAC   |
| <b>B17723</b> | <i>HSP21</i> qRT-PCR primer 1  | GACGTTGGACCTGAAGGTGT   |
| <b>B17724</b> | <i>HSP21</i> qRT-PCR primer 2  | GTCGCCTTCAATCTTCTTGG   |
| <b>B17725</b> | <i>HSP60</i> qRT-PCR primer 1  | GTGAGGAGGGTGCTGTCATT   |
| <b>B17726</b> | <i>HSP60</i> qRT-PCR primer 2  | CAGCAATCATGTCCGGTGAAC  |
| <b>B14119</b> | <i>HSP70</i> qRT-PCR primer 1  | TGGGAACCACGTATTCTCTGT  |
| <b>B14120</b> | <i>HSP70</i> qRT-PCR primer 2  | AGGCAACGTATGAGGGTGTC   |
| <b>B14121</b> | <i>HSP78</i> qRT-PCR primer 1  | GAACCGTTTGGACGAAGTGT   |
| <b>B14122</b> | <i>HSP78</i> qRT-PCR primer 2  | TCGCCAATCTCTCTCAACCT   |
| <b>B12994</b> | <i>HSP90</i> qRT-PCR primer 1  | TTCCGCTGGTGCCGATGTCT   |
| <b>B12995</b> | <i>HSP90</i> qRT-PCR primer 2  | GGACGTGGTCGGCAACCAAGAA |
| <b>B14123</b> | <i>HSP104</i> qRT-PCR primer 1 | GGATGGTGCCTTTGAAAGAA   |
| <b>B14124</b> | <i>HSP104</i> qRT-PCR primer 2 | AGGCTGCAAACCTCTCAAAA   |
| <b>B16784</b> | <i>ALS4</i> qRT-PCR primer 1   | GGTGCTATCACGGACCAAGT   |
| <b>B16785</b> | <i>ALS4</i> qRT-PCR primer 2   | CAGTGGCTTGATACGACGAA   |
| <b>B16786</b> | <i>PGA7</i> qRT-PCR primer 1   | ATTATGGCCACAGCGAAAAC   |
| <b>B16787</b> | <i>PGA7</i> qRT-PCR primer 2   | CAACAAAACCACCCAAAAAC   |
| <b>B16788</b> | <i>SIT1</i> qRT-PCR primer 1   | GGTGCCGCTACTGGTGTATT   |
| <b>B16789</b> | <i>SIT1</i> qRT-PCR primer 2   | GGAAGCTGACGCTACCACTC   |
| <b>B17623</b> | <i>SAP6</i> qRT-PCR primer 1   | TTTGCCATGTATCGCTTGAG   |
| <b>B17624</b> | <i>SAP6</i> qRT-PCR primer 2   | TCAGAGAGAGGCACCCTGAT   |
| <b>B17633</b> | <i>PGA26</i> qRT-PCR primer 1  | GGCTACTCTAACGCCACCAC   |
| <b>B17634</b> | <i>PGA26</i> qRT-PCR primer 2  | TGCAAACCTCCTCACACTTG   |
| <b>B11755</b> | <i>BCY1</i> qRT-PCR primer 1   | AATGGCACCAAGGTCAACAC   |
| <b>B11756</b> | <i>BCY1</i> qRT-PCR primer 2   | ATGCCCAACAAGTCACATCG   |

## References

1. Munoz JF, Gade L, Chow NA, Loparev VN, Juieng P, Berkow EL, Farrer RA, Litvintseva AP, Cuomo CA. 2018. Genomic insights into multidrug-resistance, mating and virulence in *Candida auris* and related emerging species. *Nat Commun* **9**:5346.
2. Kim JS, Lee KT, Lee MH, Cheong E, Bahn YS. 2021. Adenylyl cyclase and protein kinase A play redundant and distinct roles in growth, differentiation, antifungal drug resistance, and pathogenicity of *Candida auris*. *mBio* **12**:e0272921.
